# Supplementary material for: Dental Pain and Worsened Socioeconomic Conditions Due to the COVID-19 Pandemic
Source: PubMed Central journal article supplement (PMC8138328; doi:10.1177/00220345211005782), 2021-04-01
Supplement: sj-pdf-1-jdr-10.1177_00220345211005782.pdf [file sj-pdf-1-jdr-10.1177_00220345211005782.pdf]

Appendix Table 1. Effect decomposition of total effect of work reduction due to COVID-19 on dental pain (n = 11,403<sup>ab</sup>)

| Mediators <sup>c</sup>                | TE                        | NDE                       | NIE                       | PM <sup>d</sup>          |
|---------------------------------------|---------------------------|---------------------------|---------------------------|--------------------------|
|                                       | OR (95% CI <sup>e</sup> ) | OR (95% CI <sup>e</sup> ) | OR (95% CI <sup>e</sup> ) | % (95% CI <sup>e</sup> ) |
| Psychological distress: yes           | 1.59 (1.39, 1.81)         | 1.56 (1.36, 1.78)         | 1.015 (1.001, 1.033)      | 4.1 (0.2, 8.8)           |
| Postponing dental visits: yes         | 1.59 (1.39, 1.81)         | 1.49 (1.30, 1.71)         | 1.07 (1.05, 1.10)         | 17.3 (10.9, 25.4)        |
| Toothbrushing frequency/time: reduced | 1.58 (1.39, 1.80)         | 1.58 (1.39, 1.80)         | 0.999 (0.993, 1.000)      | -0.3 (-2.3, 0.1)         |
| Between-meals eating: increased       | 1.58 (1.39, 1.80)         | 1.57 (1.37, 1.79)         | 1.01 (0.99, 1.03)         | 2.8 (-1.5, 8.1)          |

Abbreviations: confidence interval, CI; odds ratio, OR; total effect, TE; natural direct effect, NDE; natural indirect effect, NIE; proportion mediated, PM

All models were adjusted for age, sex, residential region (Hokkaido/Tohoku, Kanto, Chubu, Kinki, Chugoku/Shikoku, Kyushu/Okinawa), household income reduction, job loss, educational attainment, household income in 2019, and dental checkup within the year

a People who reported income increment and those who were unemployed at the time of the survey were excluded

b People answered “other” for educational attainment were excluded for convergence in each bootstrap replication

c Each mediator was separately included

d Proportion mediated on a risk difference scale

e Estimated by bootstrap with 1,000 replications

Appendix Table 2. Effect decomposition of total effect of job loss due to COVID-19 on dental pain (n = 11,403<sup>ab</sup>)

| Mediators <sup>c</sup>                | TE                        | NDE                       | NIE                       | PM <sup>d</sup>          |
|---------------------------------------|---------------------------|---------------------------|---------------------------|--------------------------|
|                                       | OR (95% CI <sup>e</sup> ) | OR (95% CI <sup>e</sup> ) | OR (95% CI <sup>e</sup> ) | % (95% CI <sup>e</sup> ) |
| Psychological distress: yes           | 2.10 (1.45, 2.91)         | 1.72 (1.10, 2.51)         | 1.22 (1.04, 1.55)         | 34.3 (8.1, 78.1)         |
| Postponing dental visits: yes         | 2.24 (1.55, 3.16)         | 1.98 (1.34, 2.76)         | 1.13 (1.03, 1.36)         | 21.3 (5.7, 48.7)         |
| Toothbrushing frequency/time: reduced | 2.20 (1.50, 3.06)         | 1.98 (1.35, 2.71)         | 1.11 (1.01, 1.40)         | 18.3 (1.3, 49.1)         |
| Between-meals eating: increased       | 2.18 (1.49, 2.97)         | 2.09 (1.44, 2.89)         | 1.04 (0.99, 1.17)         | 7.6 (-1.4, 29.2)         |

Abbreviations: confidence interval, CI; odds ratio, OR; total effect, TE; natural direct effect, NDE; natural indirect effect, NIE; proportion mediated, PM

All models were adjusted for age, sex, residential region (Hokkaido/Tohoku, Kanto, Chubu, Kinki, Chugoku/Shikoku, Kyushu/Okinawa), household income reduction, work reduction, educational attainment, household income in 2019, and dental checkup within the year

a People who reported income increment and those who were unemployed at the time of the survey were excluded

b People answered “other” for educational attainment were excluded for convergence in each bootstrap replication

c Each mediator was separately included

d Proportion mediated on a risk difference scale

e Estimated by bootstrap with 1,000 replications

Appendix Table 3. Comparison of demographic characteristics between the study respondents and other national surveys

|                                 | Study respondents | National surveys <sup>a</sup> |
|---------------------------------|-------------------|-------------------------------|
|                                 | n (%)             | %                             |
| Age (years)                     |                   |                               |
| 15–19                           | 1,214 (4.8%)      | 6.0%                          |
| 20–29                           | 3,211 (12.6%)     | 12.4%                         |
| 30–39                           | 3,767 (14.8%)     | 15.3%                         |
| 40–49                           | 4,894 (19.2%)     | 18.8%                         |
| 50–59                           | 4,256 (16.7%)     | 15.3%                         |
| 60–69                           | 4,243 (16.7%)     | 18.3%                         |
| 70–79                           | 3,897 (15.3%)     | 13.8%                         |
| Sex                             |                   |                               |
| Men                             | 12,673 (49.7%)    | 49.6%                         |
| Women                           | 12,809 (50.3%)    | 50.4%                         |
| Residential region              |                   |                               |
| Hokkaido, Tohoku                | 2788 (10.9%)      | 11.1%                         |
| Kanto                           | 9007 (35.4%)      | 34.7%                         |
| Chubu                           | 4238 (16.6%)      | 16.7%                         |
| Kinki                           | 4521 (17.7%)      | 17.8%                         |
| Chugoku, Shikoku                | 2140 (8.4%)       | 8.6%                          |
| Kyushu                          | 2788 (10.9%)      | 11.0%                         |
| Educational attainment          |                   |                               |
| College graduate or more        | 12,172 (47.8%)    | 17.3%                         |
| Some college                    | 5,387 (21.1%)     | 12.9%                         |
| High school or less             | 7,861 (30.8%)     | 56.8%                         |
| Other                           | 62 (0.2%)         | 13.1%                         |
| Household income (thousand JPY) |                   |                               |
| ≥6,000                          | 7,700 (30.2%)     | 34.2%                         |
| 3,000–5,999                     | 7,810 (30.6%)     | 32.4%                         |
| 0–2,999                         | 4,698 (18.4%)     | 33.3%                         |
| Do not want to answer           | 2,560 (10.0%)     | -                             |
| Do not know                     | 2,714 (10.7%)     | -                             |
| Employment status               |                   |                               |
| Employed/self-employed          | 15,454 (60.6%)    | 63.3%                         |
| Unemployed                      | 10,028 (39.4%)    | 36.7%                         |

<sup>a</sup> Source: Population estimate 2016 for age, sex, and residential region; National census 2010 for educational attainment; and Comprehensive Survey of Living Conditions of People on Health and Welfare 2016 for household income and employment status.
